# Supplementary material
Source: PubMed Central journal article supplement (PMC5121085)

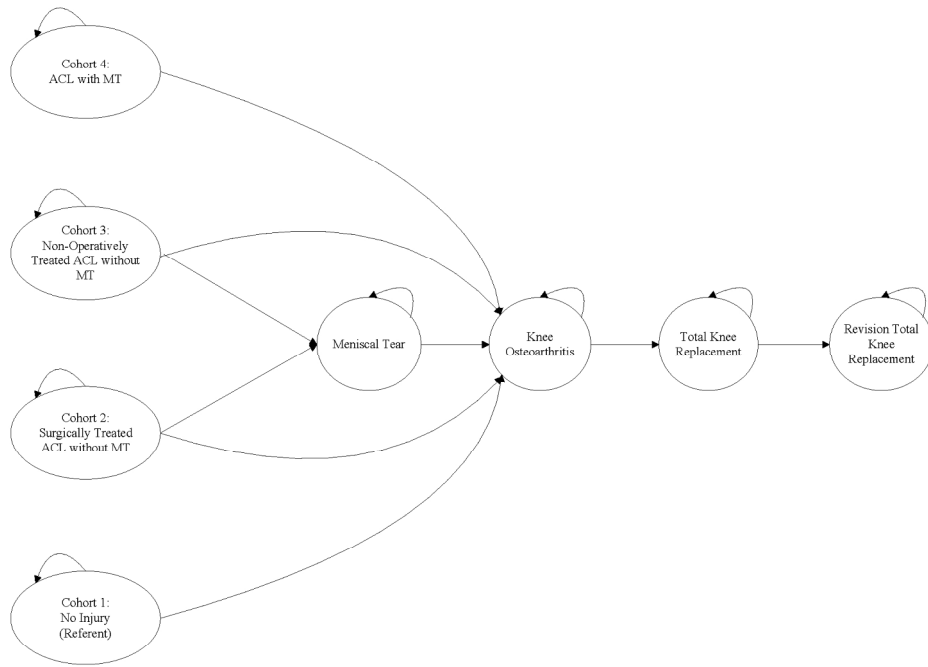

Supplement: NIHMS789141-supplement-Appendix_Fig.pdf [file NIHMS789141-supplement-Appendix_Fig.pdf]
